# Supplementary material
Source: PubMed Central journal article supplement (PMC2973003)
Supplement: 1010693107_pnas.1010693107_SI.pdf [file 1010693107_pnas.1010693107_SI.pdf]

# Supporting Information

Sevrioukova and Poulos 10.1073/pnas.1010693107

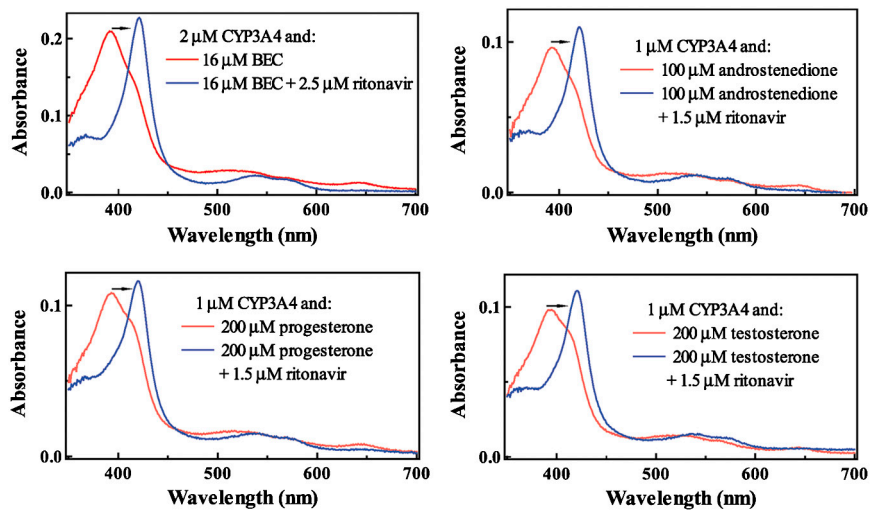

Fig. S1. Ritonavir replaces type I substrates bound to CYP3A4. Addition of a slight excess of ritonavir to the bromoergocryptine (BEC)-, progesterone-, androstenedione-, or testosterone-bound CYP3A4 leads to an immediate high-to-low spin shift.

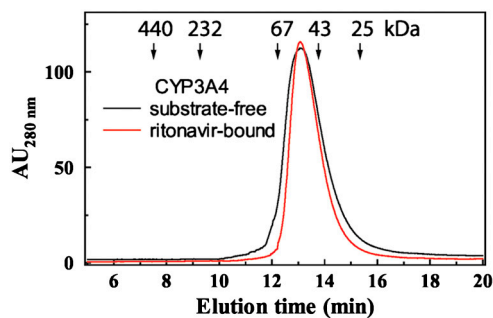

Fig. S2. Gel filtration elution profile of ligand-free and ritonavir-bound CYP3A4. The protein was eluted from the Superdex 200 FPLC column in 50 mM phosphate (pH. 7.5) and 100 mM NaCl. Arrows indicate elution time for molecular standards: 1- ferritin, 440 kDa; 2 - catalase, 232 kDa; 3 - albumin, 67 kDa; 4 - ovalbumin, 43 kDa; and 5 - chymotrypsinogen A, 25 kDa.
